# Supplementary material for: The Antifungal Effects of Citral on Magnaporthe oryzae Occur via Modulation of Chitin Content as Revealed by RNA-Seq Analysis
Source: MDPI journal article supplement (doi:10.3390/jof7121023), 2021-11-29
Supplement: s1 [file s1]

**Table S3.** Comparison of transcriptome sequencing and reference genome of *M. oryzae* under citral stress.

| Sample | Valid reads | Mapped reads     | Unique Mapped reads | exon  | intron | intergenic |
|--------|-------------|------------------|---------------------|-------|--------|------------|
| a0_1   | 40190860    | 37155714(92.45%) | 34573529(86.02%)    | 98.41 | 1.42   | 0.17       |
| a0_2   | 32637092    | 30329975(92.93%) | 28206299(86.42%)    | 98.12 | 1.66   | 0.22       |
| a0_3   | 31574984    | 29336859(92.91%) | 27058394(85.70%)    | 98.49 | 1.34   | 0.17       |
| A2_1   | 44460028    | 40219396(90.46%) | 37268729(83.83%)    | 98.36 | 1.45   | 0.19       |
| A2_2   | 41826300    | 39277917(93.91%) | 36353023(86.91%)    | 98.40 | 1.44   | 0.17       |
| A2_3   | 38927102    | 35982339(92.44%) | 33521134(86.11%)    | 98.17 | 1.62   | 0.21       |
| A3_1   | 35677366    | 31937455(89.52%) | 29487380(82.65%)    | 98.22 | 1.59   | 0.19       |
| A3_2   | 32999572    | 30016444(90.96%) | 27860653(84.43%)    | 98.23 | 1.58   | 0.18       |
| A3_3   | 38102392    | 35325305(92.71%) | 32635942(85.65%)    | 98.22 | 1.60   | 0.18       |
| A4_1   | 35256260    | 32652750(92.62%) | 30084677(85.33%)    | 97.84 | 1.98   | 0.18       |
| A4_2   | 35937312    | 32898493(91.54%) | 30657382(85.31%)    | 98.03 | 1.79   | 0.18       |
| A4_3   | 42175516    | 39411488(93.45%) | 36599078(86.78%)    | 97.81 | 2.01   | 0.18       |
| b0_1   | 40516006    | 36972479(91.25%) | 34291973(84.64%)    | 98.49 | 1.27   | 0.24       |
| b0_2   | 41085158    | 38577768(93.90%) | 35654650(86.78%)    | 98.42 | 1.35   | 0.24       |
| b0_3   | 39467774    | 36538317(92.58%) | 33783039(85.60%)    | 98.51 | 1.25   | 0.24       |
| B2_1   | 36655378    | 33037151(90.13%) | 30357455(82.82%)    | 98.23 | 1.56   | 0.21       |
| B2_2   | 31181238    | 28674010(91.96%) | 26512300(85.03%)    | 98.15 | 1.65   | 0.21       |
| B2_3   | 34309364    | 31295736(91.22%) | 28816637(83.99%)    | 98.25 | 1.54   | 0.22       |
| B3_1   | 38055198    | 34613739(90.96%) | 31963455(83.99%)    | 98.04 | 1.77   | 0.20       |
| B3_2   | 35762606    | 32688873(91.41%) | 30357527(84.89%)    | 98.09 | 1.72   | 0.19       |
| B3_3   | 40124154    | 37251610(92.84%) | 34480202(85.93%)    | 98.08 | 1.73   | 0.20       |
| B4_1   | 37941296    | 34980924(92.20%) | 32294796(85.12%)    | 98.29 | 1.51   | 0.20       |
| B4_2   | 33574620    | 30436056(90.65%) | 28126387(83.77%)    | 98.31 | 1.50   | 0.19       |
| B4_3   | 34245100    | 31522775(92.05%) | 29330914(85.65%)    | 98.34 | 1.47   | 0.20       |
| c0_1   | 39991880    | 36855518(92.16%) | 34205704(85.53%)    | 98.44 | 1.36   | 0.20       |
| c0_2   | 37878658    | 35613103(94.02%) | 33013316(87.16%)    | 98.39 | 1.43   | 0.18       |
| c0_3   | 36572658    | 33754659(92.29%) | 31530601(86.21%)    | 98.71 | 1.11   | 0.17       |
| C2_1   | 37354334    | 33073204(88.54%) | 30510572(81.68%)    | 98.43 | 1.36   | 0.21       |
| C2_2   | 32418936    | 29334009(90.48%) | 27162114(83.78%)    | 98.67 | 1.16   | 0.17       |
| C2_3   | 32196282    | 29459254(91.50%) | 27352757(84.96%)    | 98.55 | 1.25   | 0.20       |
| C3_1   | 31206078    | 29001333(92.93%) | 26638596(85.36%)    | 98.72 | 1.10   | 0.18       |
| C3_2   | 33382398    | 30176492(90.40%) | 27946201(83.72%)    | 98.71 | 1.10   | 0.19       |
| C3_3   | 36485950    | 33910068(92.94%) | 31394261(86.04%)    | 98.68 | 1.12   | 0.19       |
| C4_1   | 37824604    | 35026515(92.60%) | 32454235(85.80%)    | 98.44 | 1.39   | 0.16       |
| C4_2   | 44578076    | 41131557(92.27%) | 38230696(85.76%)    | 98.47 | 1.37   | 0.17       |
| C4_3   | 37807386    | 35035661(92.67%) | 32615798(86.27%)    | 98.45 | 1.39   | 0.16       |

a0, A2, A3, A4. *M. oryzae* treating with 0 µg/mL citral, b0, B1, B2, B3, B4. *M. oryzae* treating with 50 µg/mL , c0, C1, C2, C3, C4 *M. oryzae* treating with 100 µg/mL.

There are three repetitions for each treatment.
