# Supplementary material for: The Antifungal Effects of Citral on Magnaporthe oryzae Occur via Modulation of Chitin Content as Revealed by RNA-Seq Analysis
Source: MDPI journal article supplement (doi:10.3390/jof7121023), 2021-11-29
Supplement: s1 [file s1]

**Table S4.** Large value distribution statistics of reference gene table for transcriptome sequencing of *M. oryzae* under citral stress.

| Sample | Exp gene | Min. | 1st Qu. | Median | Mean  | 3rd Qu. | Max.     | Sd.    | Sum.      |
|--------|----------|------|---------|--------|-------|---------|----------|--------|-----------|
| a0_1   | 13053    | 0.00 | 0.42    | 6.28   | 51.50 | 25.89   | 13666.67 | 284.15 | 672283.16 |
| a0_2   | 13053    | 0.00 | 0.14    | 4.38   | 47.60 | 20.40   | 22744.68 | 317.37 | 621285.25 |
| a0_3   | 13053    | 0.00 | 0.16    | 6.08   | 50.71 | 25.56   | 10496.43 | 258.63 | 661892.17 |
| b0_1   | 13053    | 0.00 | 0.04    | 3.40   | 50.88 | 17.57   | 17797.61 | 301.25 | 664168.39 |
| b0_2   | 13053    | 0.00 | 0.08    | 3.41   | 50.48 | 17.98   | 18036.74 | 297.36 | 658867.19 |
| b0_3   | 13053    | 0.00 | 0.10    | 3.45   | 50.90 | 17.86   | 18652.30 | 303.48 | 664339.56 |
| c0_1   | 13053    | 0.00 | 0.00    | 1.94   | 49.95 | 11.05   | 29743.22 | 476.18 | 651986.49 |
| c0_2   | 13053    | 0.00 | 0.00    | 1.83   | 48.65 | 10.57   | 25141.15 | 451.48 | 635078.48 |
| c0_3   | 13053    | 0.00 | 0.12    | 2.70   | 51.91 | 13.90   | 22815.19 | 424.20 | 677623.87 |
| A2_1   | 13053    | 0.00 | 0.40    | 7.47   | 49.40 | 28.32   | 18671.75 | 267.81 | 644815.79 |
| A2_2   | 13053    | 0.00 | 0.33    | 6.02   | 50.14 | 25.06   | 10643.17 | 253.70 | 654449.07 |
| A2_3   | 13053    | 0.00 | 0.22    | 5.95   | 48.60 | 24.31   | 22793.38 | 305.46 | 634404.27 |
| B2_1   | 13053    | 0.00 | 0.06    | 6.67   | 49.97 | 25.41   | 14181.24 | 265.00 | 652271.56 |
| B2_2   | 13053    | 0.00 | 0.03    | 6.83   | 49.96 | 25.75   | 14496.08 | 267.19 | 652096.71 |
| B2_3   | 13053    | 0.00 | 0.06    | 6.67   | 50.27 | 25.25   | 13953.27 | 267.05 | 656121.53 |
| C2_1   | 13053    | 0.00 | 0.45    | 7.79   | 47.64 | 30.61   | 12766.48 | 224.52 | 621820.35 |
| C2_2   | 13053    | 0.00 | 0.46    | 7.70   | 51.70 | 28.09   | 36563.15 | 380.14 | 674845.72 |
| C2_3   | 13053    | 0.00 | 0.35    | 7.71   | 47.36 | 30.82   | 11651.12 | 213.76 | 618165.99 |
| A3_1   | 13053    | 0.00 | 0.32    | 6.53   | 48.13 | 26.13   | 22481.96 | 282.62 | 628203.33 |
| A3_2   | 13053    | 0.00 | 0.23    | 6.61   | 48.21 | 25.79   | 22812.56 | 284.89 | 629220.69 |
| A3_3   | 13053    | 0.00 | 0.09    | 6.37   | 46.71 | 25.69   | 22139.84 | 275.78 | 609764.24 |
| B3_1   | 13053    | 0.00 | 0.45    | 7.16   | 49.47 | 26.94   | 12571.48 | 253.60 | 645675.35 |
| B3_2   | 13053    | 0.00 | 0.37    | 7.24   | 49.90 | 26.50   | 12564.43 | 258.47 | 651408.03 |
| B3_3   | 13053    | 0.00 | 0.38    | 7.15   | 49.46 | 26.97   | 11786.47 | 250.96 | 645613.67 |
| C3_1   | 13053    | 0.00 | 0.21    | 6.33   | 52.04 | 24.35   | 17917.82 | 298.37 | 679311.21 |
| C3_2   | 13053    | 0.00 | 0.00    | 6.10   | 52.33 | 23.77   | 18352.98 | 306.86 | 683097.37 |
| C3_3   | 13053    | 0.00 | 0.15    | 6.18   | 52.14 | 24.38   | 18264.81 | 304.97 | 680630.26 |
| A4_1   | 13053    | 0.00 | 0.36    | 5.44   | 46.46 | 22.55   | 17490.75 | 259.44 | 606467.31 |
| A4_2   | 13053    | 0.00 | 0.53    | 6.94   | 46.82 | 26.87   | 20228.89 | 264.64 | 611109.71 |
| A4_3   | 13053    | 0.00 | 0.42    | 5.39   | 46.36 | 22.75   | 17531.29 | 259.77 | 605102.69 |
| B4_1   | 13053    | 0.00 | 0.63    | 7.94   | 50.26 | 28.37   | 15808.50 | 269.41 | 656095.16 |
| B4_2   | 13053    | 0.00 | 0.49    | 7.87   | 50.33 | 28.12   | 16329.18 | 272.65 | 656950.52 |
| B4_3   | 13053    | 0.00 | 0.51    | 7.82   | 50.46 | 27.97   | 16214.79 | 273.26 | 658662.60 |
| C4_1   | 13053    | 0.00 | 0.54    | 7.67   | 51.92 | 27.50   | 15139.83 | 287.17 | 677759.28 |
| C4_2   | 13053    | 0.00 | 0.54    | 7.73   | 51.94 | 27.36   | 14999.00 | 290.87 | 677972.89 |
| C4_3   | 13053    | 0.00 | 0.58    | 7.73   | 52.04 | 27.14   | 15040.03 | 292.16 | 679289.80 |

a0, A2, A3, A4. *M. oryzae* treating with 0 µg/mL citral, b0, B1, B2, B3, B4. *M. oryzae* treating with 50 µg/mL , c0, C1, C2, C3, C4 *M. oryzae* treating with 100 µg/mL. There are three repetitions for each treatment.
