# Supplementary material for: The Antifungal Effects of Citral on Magnaporthe oryzae Occur via Modulation of Chitin Content as Revealed by RNA-Seq Analysis
Source: MDPI journal article supplement (doi:10.3390/jof7121023), 2021-11-29
Supplement: s1 [file s1]

**Table S1.** 8 genes of primer design for RT-qPCR

| Gene                                             | Primer name      | Forward primer (5' –3' ) | Reverse primer (5' –3' ) |
|--------------------------------------------------|------------------|--------------------------|--------------------------|
| class III chitinase                              | <i>MGG_10333</i> | ATGTTCGGTCCTCCTCTGCTG    | GGCGGCGAGGTTCTTGATGC     |
| galactose-1-phosphate uridylyltransferase        | <i>MGG_05098</i> | TCGCAGCCATCGCAACAACACTAC | CAATTCCTTGCCTGGTTCCTCTGG |
| phosphoglucomutase                               | <i>MGG_04495</i> | TTCGCAAGAAGGTCACAGTGTTCC | CGTCCGTCACCGCCAATCAC     |
| glucosamine-6-phosphate isomerase                | <i>MGG_00625</i> | AATGATAGTGTGCGACGAGGATGC | CCACCTGCTCGATGCTCTTGAAG  |
| FAD binding domain-containing protein            | <i>MGG_01605</i> | GTCAGCCACCTCTTCACCTTTAGC | TGCCTCGTGTATCCTGGTCTGG   |
| bacteriodes thetaiotaomicron symbiotic chitinase | <i>MGG_01336</i> | GGCGGAGGCGAGTTCAACAC     | CGGATAAACTGGGCACGGGAAG   |
| bacteriodes thetaiotaomicron symbiotic chitinase | <i>MGG_03920</i> | CTGTTCTTCGTCCTGGCGTTCC   | AGAAGTAGTGGGTGAGGTCGTAGC |
| chitin synthase 3                                | <i>MGG_09551</i> | TGTCAAGGCGATAATGGCGGATG  | GAACATCAGGAGCGAGGCAACC   |
