# Supplementary material for: The Antifungal Effects of Citral on Magnaporthe oryzae Occur via Modulation of Chitin Content as Revealed by RNA-Seq Analysis
Source: MDPI journal article supplement (doi:10.3390/jof7121023), 2021-11-29
Supplement: s1 [file s1]

**Table S2.** Summary of reference genetic data from processed samples.

| Sample | Valid Data Read | Valid Data Read | Valid Ratio(reads) | Valid_Base (Gb) | Q20%  | Q30%  | GC content% |
|--------|-----------------|-----------------|--------------------|-----------------|-------|-------|-------------|
| a0_1   | 40190860        | 40190860        | 82.91              | 6.03G           | 99.99 | 99.29 | 53.00       |
| a0_2   | 32637092        | 32637092        | 81.62              | 4.90G           | 99.98 | 99.26 | 52.00       |
| a0_3   | 31574984        | 31574984        | 79.46              | 4.74G           | 99.99 | 99.27 | 52.00       |
| A2_1   | 44460028        | 44460028        | 84.06              | 6.67G           | 99.98 | 99.11 | 51.50       |
| A2_2   | 41826300        | 41826300        | 85.03              | 6.27G           | 99.98 | 99.23 | 52.00       |
| A2_3   | 38927102        | 38927102        | 78.64              | 5.84G           | 99.98 | 99.19 | 51.00       |
| A3_1   | 35677366        | 35677366        | 82.45              | 5.35G           | 99.98 | 99.08 | 51.00       |
| A3_2   | 32999572        | 32999572        | 79.27              | 4.95G           | 99.98 | 99.18 | 51.50       |
| A3_3   | 38102392        | 38102392        | 82.12              | 5.72G           | 99.98 | 99.11 | 52.00       |
| A4_1   | 35256260        | 35256260        | 85.73              | 5.29G           | 99.98 | 99.16 | 52.00       |
| A4_2   | 35937312        | 35937312        | 86.01              | 5.39G           | 99.98 | 99.22 | 52.00       |
| A4_3   | 42175516        | 42175516        | 88.76              | 6.33G           | 99.98 | 99.23 | 52.00       |
| b0_1   | 40516006        | 40516006        | 81.71              | 6.08G           | 99.98 | 99.22 | 52.00       |
| b0_2   | 41085158        | 41085158        | 87.09              | 6.16G           | 99.98 | 99.26 | 53.00       |
| b0_3   | 39467774        | 39467774        | 84.46              | 5.92G           | 99.98 | 99.24 | 52.50       |
| B2_1   | 36655378        | 36655378        | 79.69              | 5.50G           | 99.98 | 99.10 | 52.00       |
| B2_2   | 31181238        | 31181238        | 75.23              | 4.68G           | 99.98 | 99.19 | 52.00       |
| B2_3   | 34309364        | 34309364        | 77.08              | 5.15G           | 99.98 | 99.11 | 52.00       |
| B3_1   | 38055198        | 38055198        | 82.14              | 5.71G           | 99.98 | 99.16 | 52.00       |
| B3_2   | 35762606        | 35762606        | 81.61              | 5.36G           | 99.98 | 99.22 | 52.00       |
| B3_3   | 40124154        | 40124154        | 83.27              | 6.02G           | 99.98 | 99.23 | 52.00       |
| B4_1   | 37941296        | 37941296        | 87.92              | 5.69G           | 99.98 | 99.17 | 52.00       |
| B4_2   | 33574620        | 33574620        | 83.61              | 5.04G           | 99.98 | 99.17 | 52.00       |
| B4_3   | 34245100        | 34245100        | 81.71              | 5.14G           | 99.98 | 99.22 | 52.00       |
| c0_1   | 39991880        | 39991880        | 85.76              | 6.00G           | 99.98 | 99.24 | 52.00       |
| c0_2   | 37878658        | 37878658        | 84.75              | 5.68G           | 99.98 | 99.20 | 52.00       |
| c0_3   | 36572658        | 36572658        | 86.05              | 5.49G           | 99.98 | 99.36 | 53.00       |
| C2_1   | 37354334        | 37354334        | 79.16              | 5.60G           | 99.98 | 99.12 | 52.00       |
| C2_2   | 32418936        | 32418936        | 85.09              | 4.86G           | 99.98 | 99.26 | 53.00       |
| C2_3   | 32196282        | 32196282        | 76.23              | 4.83G           | 99.98 | 99.18 | 52.00       |
| C3_1   | 31206078        | 31206078        | 77.84              | 4.68G           | 99.98 | 99.10 | 52.00       |
| C3_2   | 33382398        | 33382398        | 75.63              | 5.01G           | 99.98 | 99.09 | 51.50       |
| C3_3   | 36485950        | 36485950        | 80.62              | 5.47G           | 99.98 | 99.11 | 52.00       |
| C4_1   | 37824604        | 37824604        | 87.01              | 5.67G           | 99.98 | 99.25 | 53.00       |
| C4_2   | 44578076        | 44578076        | 88.48              | 6.69G           | 99.99 | 99.26 | 53.00       |
| C4_3   | 37807386        | 37807386        | 88.17              | 5.67G           | 99.99 | 99.26 | 52.00       |

a0, A2, A3, A4. *Magnaporthe oryzae* treating with 0 µg/mL citral, b0, B1, B2, B3, B4. *M. oryzae* treating with 50 µg/mL , c0, C1, C2, C3, C4 *M. oryzae* treating with 100 µg/mL. There are three repetitions for each treatment.
